1 **Wastewater-based epidemiology for tracking COVID-19 trend and variants of**  
2 **concern in Ohio, United States**

3

4 Yuehan Ai<sup>1</sup>, Angela Davis<sup>2</sup>, Danial Jones<sup>3,5</sup>, Stanley Lemeshow<sup>4</sup>, Huolin Tu<sup>3</sup>, Fan He<sup>1</sup>, Peng  
5 Ru<sup>3</sup>, Xiaokang Pan<sup>5</sup>, Zuzana Bohrerova<sup>6</sup>, Jiyoung Lee<sup>1,2,3\*</sup>

6

7 <sup>1</sup>Department of Food Science and Technology, The Ohio State University, Columbus, OH, USA

8 <sup>2</sup>Division of Environmental Health Sciences, College of Public Health, The Ohio State  
9 University, Columbus, OH, USA

10 <sup>3</sup>The Ohio State University Comprehensive Cancer Center and James Cancer Center, Columbus,  
11 OH, USA

12 <sup>4</sup>Division of Biostatistics, College of Public Health, The Ohio State University, Columbus, OH,  
13 USA

14 <sup>5</sup>James Molecular Laboratory, The Ohio State University Wexner Medical Center, Columbus,  
15 OH, USA

16 <sup>6</sup>Department of Civil, Environmental and Geodetic Engineering, The Ohio State University,  
17 Columbus, Ohio, USA

18

19 \*Corresponding authors: Jiyoung Lee, email: [lee.3598@osu.edu](mailto:lee.3598@osu.edu)

20

21 **Abstract:**

22 The global pandemic caused by severe acute respiratory syndrome coronavirus 2 (SARS-  
23 CoV-2) has resulted in more than 129 million confirm cases. Many health authorities around the

24 world have implemented wastewater-based epidemiology as a rapid and complementary tool for  
25 the COVID-19 surveillance system and more recently for variants of concern emergence  
26 tracking. In this study, three SARS-CoV-2 target genes (N1, N2, and E) were quantified from  
27 wastewater influent samples (n = 250) obtained from the capital city and 7 other cities in various  
28 size in central Ohio from July 2020 to January 2021. To determine human-specific fecal strength  
29 in wastewater samples more accurately, two human fecal viruses (PMMoV and crAssphage)  
30 were quantified to normalize the SARS-CoV-2 gene concentrations in wastewater. To estimate  
31 the trend of new case numbers from SARS-CoV-2 gene levels, different statistical models were  
32 built and evaluated. From the longitudinal data, SARS-CoV-2 gene concentrations in wastewater  
33 strongly correlated with daily new confirmed COVID-19 cases (average Spearman's  $r = 0.70$ ,  $p$   
34  $< 0.05$ ), with the N2 gene being the best predictor of the trend of confirmed cases. Moreover,  
35 average daily case numbers can help reduce the noise and variation from the clinical data.  
36 Among the models tested, the quadratic polynomial model performed best in correlating and  
37 predicting COVID-19 cases from the wastewater surveillance data, which can be used to track  
38 the effectiveness of vaccination in the later stage of the pandemic. Interestingly, neither of the  
39 normalization methods using PMMoV or crAssphage significantly enhanced the correlation with  
40 new case numbers, nor improved the estimation models. Whole-genome sequencing result  
41 showed that those detected SARS-CoV-2 variants of concern from the wastewater matched with  
42 the clinical isolates from the communities. The findings from this study suggest that wastewater  
43 surveillance is effective in COVID-19 trend tracking and variant emergence and transmission  
44 within a community.

45 **Keywords:** SARS-CoV-2; PMMoV; crAssphage; quadratic polynomial model; N501Y;  
46 B.1.427/429; D614G

47

## 48 **1. Introduction**

49       Coronavirus disease 2019 (COVID-19), first reported in Wuhan, China, is caused by Severe  
50 Acute Respiratory Syndrome Coronavirus 2 (SARS-CoV-2) and has resulted in more than 2.8  
51 million deaths and 129 million confirmed cases globally as of April 2021 (1-2). Community and  
52 intrafamily transmission is one of the most common modes of human-to-human transmission of  
53 SARS-CoV-2 (3). However, the transmission of COVID-19 can occur before the confirmation of  
54 a clinical diagnosis (4). For more effective control and timely monitoring of the outbreaks,  
55 wastewater-based SARS-CoV-2 surveillance has been implemented as a complementary tool for  
56 the COVID-19 surveillance system (5, 6). Wastewater-based epidemiology (WBE) has been  
57 employed to monitor a variety of pathogenic viruses around the world such as Polio, Dengue,  
58 Norovirus, and SARs-CoV (7). WBE targets the DNA/RNA residue from viruses, which serve as  
59 a population biomarker of the pathogen. Not like other respiratory viruses, SARS-CoV-2 is  
60 found in the gastrointestinal tracts and stools of majority of infected people (8, 9). The  
61 discharged virus has been detected in wastewater streams at the early stages of the pandemic and  
62 even before the first recorded case (10-13). With the analysis of viral signals in population-  
63 pooled wastewater samples, WBE can provide early warnings of COVID-19 emergence at a  
64 community level (14-17).

65       The WBE surveillance of COVID-19 is advantageous in many other ways. Firstly, with  
66 approximately 105,600 wastewater treatment plants operating globally, 27% of the global  
67 population can benefit from health information provided by WBE (5). Wastewater can capture  
68 signals from symptomatic as well as pre-symptomatic/asymptomatic carriers, which tend to be  
69 under-detected by clinical tests. Secondly, wastewater provides a longer detection window for

70 the SARS-CoV-2 carriers since RNA signals in fecal samples showed longer persistency than in  
71 oropharyngeal swabs (9). Thirdly, it is hard to gain a “real-time” picture of the pandemic from  
72 clinical screening due to backlogs of test results up to 10 days (18-19). WBE is capable of  
73 generating results in a real-time manner with a relatively low cost compared to individual clinical  
74 testing, enabling the decision-makers to identify outbreak hotspots and take timely actions (20).  
75 Moreover, WBE can aid in monitoring the epidemic progression by giving reliable information  
76 on the effectiveness of intervention strategies. As several SARS-CoV-2 variants have emerged,  
77 some studies successfully employed WBE to investigate the circulating viral variants in the  
78 wastewater through high-throughput sequencing (21-23). Therefore, WBE has been adopted as a  
79 COVID-19 trend tracker and more recently for detecting variants by public health authorities in  
80 the United States.

81 At present, most wastewater-associated studies have focused on municipal wastewater  
82 and covered a relatively short period of time at the early stages of the pandemic. In an effort to  
83 help with the long-term monitoring of the spread of COVID-19 across the state of Ohio, the Ohio  
84 Department of Health (ODH), the Ohio Environmental Protection Agency (Ohio EPA), and Ohio  
85 Water Resources Center (Ohio WRC) at The Ohio State University established the Ohio  
86 Coronavirus Wastewater Monitoring Network (6) using participating laboratories in Ohio. The  
87 present study contributes to the network by generating critical wastewater-based information for  
88 the populations in nine various sewage catchments in central Ohio, including the largest city,  
89 Columbus, and other urban and rural areas. A quantitative method was developed and validated  
90 for the measurement of SARS-CoV-2 gene targets in wastewater samples. To further evaluate  
91 the feasibility of using WBE as a predicting/modeling tool for the COVID-19 outbreak  
92 dynamics, correlations between the concentrations of SARS-CoV-2 genes in wastewater and the

93 clinical COVID-19 case number in their corresponding sewershed areas were investigated. In  
94 order to compensate for the fluctuation in fecal material caused by dilution, we investigated  
95 normalization methods with two of the most prevalent human fecal viral indicators, pepper mild  
96 mottle virus (PMMoV) and cross-assembly phage (crAssphage) (22, 24-28). Moreover, this  
97 study explored whether the wastewater matrix can serve as a sentinel piece for detecting SARS-  
98 CoV-2 variants of concern within a community.

99

## 100 **2. Materials and Methods**

### 101 **2.1. Sampling sites and wastewater collection**

102 Nine wastewater treatment plants (WWTPs) in central Ohio were involved in this study. Two  
103 of the WWTPs (Jackson Pike and Southerly) serve different catchments in Columbus, which is  
104 the largest city in Ohio with a population of around 900,000 (29). The sewersheds of the other  
105 wastewater facilities cover 7 smaller Ohio cities (Athens, Circleville, Lancaster, Marietta,  
106 Marysville, Newark, and Zanesville) in urban and rural areas with population ranges from 14,000  
107 to 49,000 (29). Confirmed COVID-19 case numbers and the boundaries of all 9 sewershed  
108 catchments vary (Figure 1), and details on the serving population and operating characteristics of  
109 the WWTPs are summarized (Table 1). Approximately one liter of 24-hour composite samples  
110 were collected from the WWTPs twice a week, representing the untreated wastewater influent of  
111 Sunday and Tuesday. The sampling period started in late July 2020, with varied starting dates  
112 among sites, and ended at the first week of January 2021. Wastewater samples obtained from  
113 Jackson Pike, Southerly, and Newark WWTPs were delivered to the lab and processed on the  
114 sampling day. Samples from the other utilities were shipped on ice overnight and processed on  
115 the following day. Samples were immediately stored at 4°C until further processing. Samples

116 that were delayed in their shipment and subjected to temperature abuse ( $> 10^{\circ}\text{C}$ ) were not  
 117 processed.

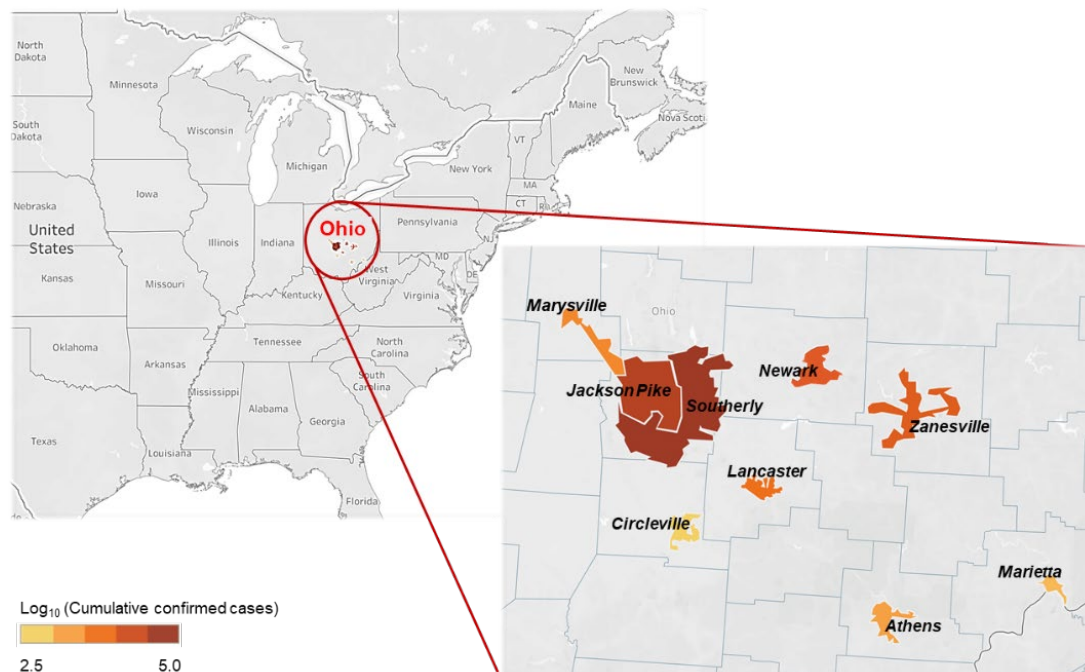

118  
 119 **Figure 1.** Geographic boundaries and locations of nine sewersheds and cumulative confirmed  
 120 COVID-19 case numbers.

121  
 122 **Table 1.** Summary of WWTP operating characteristics and each sewershed population with  
 123 confirmed case numbers during the study period.

| WWTP name    | City        | County     | Sewer type | Average flowrate (MGD) | Population served | Cumulative confirmed cases <sup>a</sup> | Cumulative incidence (cases /100,000 residents) |
|--------------|-------------|------------|------------|------------------------|-------------------|-----------------------------------------|-------------------------------------------------|
| Jackson Pike | Columbus    | Franklin   | Combined   | 82                     | 645,940           | 41,557                                  | 6,434                                           |
| Southerly    | Columbus    | Franklin   | Combined   | 130.4                  | 654,817           | 46,248                                  | 7,063                                           |
| Athens       | Athens      | Athens     | Separate   | 2.6                    | 24,536            | 1,523                                   | 6,207                                           |
| Circleville  | Circleville | Pickaway   | Separate   | 2.01                   | 13,965            | 692                                     | 4,955                                           |
| Lancaster    | Lancaster   | Fairfield  | Combined   | 7.67                   | 24,303            | 2,616                                   | 10,764                                          |
| Marysville   | Marysville  | Union      | Separate   | 4.37                   | 24,677            | 2,166                                   | 8,777                                           |
| Marietta     | Marietta    | Washington | Separate   | 2.84                   | 15,284            | 842                                     | 5,509                                           |
| Newark       | Newark      | Licking    | Combined   | 9                      | 45,000            | 2,889                                   | 6,420                                           |

---

| Zanesville | Zanesville | Muskingum | Combined | 5.8 | 47,500 | 2,653 | 5,585 |
|------------|------------|-----------|----------|-----|--------|-------|-------|
|------------|------------|-----------|----------|-----|--------|-------|-------|

---

124 <sup>a</sup> Cumulative confirmed cases from the beginning of the pandemic to 01/02/2021.

125

## 126 **2.2. Wastewater processing: Virus filtration and concentration**

127 To concentrate virus from wastewater samples, two approaches were used after optimization.

128 Initially, an adsorption-precipitation-based method was adopted. Virus was first adsorbed and

129 eluted from a positively charged filter unit (ViroCap, Scientific Methods, Inc., Granger, IN,

130 USA), followed by concentrating via organic flocculation and centrifugal ultrafiltration

131 (Supplementary Method S1) (30). For faster turnaround, from the second month of the study, we

132 employed a protocol consisting of solid removal and viral concentration. Each wastewater

133 sample was processed in duplicate. First, 100 mL of raw wastewater with 0.05% Tween-20 were

134 centrifuged at 4°C, 2,500 x g for 10 minutes for large solid removal. Small debris and bacteria

135 were further removed by filtering the supernatant using a 0.45 µM sterile filter unit (Milipore,

136 Burlington, MA, USA). Then, the filtrate was concentrated using a 0.05 µm Hollow Fiber

137 Polysulfone Concentrating Pipette Select tips (Innovaprep, Drexel, MO, USA). Approximately

138 200 µL of viral concentrate was then eluted following the manufacturer's instruction with some

139 modifications: valve open for 600 ms, 1 pulse, foam factor of 10, valve start time of 3.0 seconds,

140 flow end of 10 seconds, flow minimum start time of 40 seconds, delay of 3.0 seconds, pump at

141 25%, pump delay time of 1 second, and stored at -80°C for downstream analysis. Recovery

142 efficiency of the method was evaluated by spiking (~10<sup>9</sup> gene copies/mL) with three different

143 surrogates: male specific coliphage MS2 (ATCC cat. No. 15597-B1), bovine coronavirus (BCoV

144 strain ML-6 mebus), and human coronavirus OC43 (ATCC cat. No. VR-1558) (32-33).

145

## 146 **2.3. RNA/DNA extraction and RT-ddPCR analysis**

147 RNA/DNA was extracted from the viral concentrate using an RNeasy PowerMicrobiome Kit  
148 (QIAGEN, Germantown, MD, USA). Reverse transcription was conducted with the High-  
149 Capacity cDNA Reverse Transcription Kit (Applied Biosystems, Pittsburgh, PA, USA). 3  $\mu$ L  
150 cDNA was applied to the quantification of SARS-CoV-2 genome equivalents using a droplet  
151 digital PCR (ddPCR) platform (Bio-rad QX200 system). Three ddPCR assays were developed to  
152 target two nucleocapsid (N) genes and the envelope (E) gene of SARS-CoV-2. The N gene assay  
153 employs two primers/probe sets from U.S. Centers for Disease Control and Prevention (CDC),  
154 amplifying the N1 and N2 regions (34-35). The E gene assay is based on the E\_Sarbeco  
155 primers/probe set recommended by WHO (36). Quantifications for three SARS-CoV-2  
156 surrogates (MS2, BCoV, and OC32) and two human fecal indicators (PMMoV and crAssphage)  
157 were also conducted with diluted cDNA (37-41). The reaction mixture (20  $\mu$ L) contains ddPCR  
158 supermix for probes (Bio-Rad, Hercules, CA, USA), DNase- & RNase-free water, 900 nM of  
159 forward and reverse primers, 250 nM of probe, and templates. Firefly (*Coleoptera*) Luciferase  
160 control RNA (Promega, Madison, WI, USA) was implemented as an internal amplification  
161 control for the detection of PCR inhibition (42). ddPCR mixture with or without wastewater  
162 cDNA template were spiked with an equal titer of Luciferase cDNA. PCR inhibition was  
163 assessed by comparing the difference in Luciferase gene amplification. Primer/probe sequences  
164 and ddPCR parameters used in this study are summarized (Table S1). Briefly, after droplet  
165 generation using the QX200 Droplet Generator, target genes were amplified with a Bio-Rad  
166 C1000 Touch Thermal Cycler. The cycling conditions included an initial denaturing step at 94°C  
167 for 10 minutes, followed by 40-45 cycles of 94°C for 30 seconds and annealing for 60 seconds.  
168 A final incubation step was performed at 98°C for 10 minutes and then a final hold of 4°C. After



169 amplification, gene concentrations were quantified using a QX200 droplet reader and QuantaSoft  
170 (V 1.7; Bio-Rad). Two technical replicates were performed for each ddPCR assay.

171

## 172 **2.4. Quantification and statistical analysis**

173 COVID-19 case numbers were retrieved from ODH COVID-19 Dashboard (6), reflecting the  
174 confirmed case counts by the estimated symptom onset date. The boundaries of the sewersheds  
175 were mapped with Tableau (V 2020.1) (Figure 1). 3-day, 5-day, and 7-day moving averages  
176 were calculated from the case numbers using “zoo” package in RStudio (V 1.3.1093). All other  
177 plots were generated with “ggplot” package in Rstudio. Target gene copy numbers were  
178 calculated as the mean of four replicates (two biological and two technical replicates). The limit  
179 of quantification (LOQ) of ddPCR assay is two gene copies/reaction. For detectable-but-not-  
180 quantifiable (DNQ) measurements, the results are recorded as one-half of the LOQ. All statistical  
181 analyses were performed in RStudio using “ggpubr”, “stats”, and “rstatix” packages. A *p-value* <  
182 0.05 is considered statistically significant. The strength of a linear association was first assessed  
183 through a Pearson correlation coefficient. All essential assumptions were examined (normality  
184 and linearity). SARS-CoV-2 RNA concentrations and case counts were fitted into a linear model.  
185 Spearman’s non-parametric correlation coefficients were also computed since they were less  
186 dependent on the underlying distributions being normal. Additionally, polynomial regressions  
187 models were fit. Significance of regression models was assessed via the F-test.

188

## 189 **2.5. SARS-CoV-2 genome sequencing and mutation analysis**

190 A subset of samples of early January 2021 was selected for next-generation sequencing  
191 (NGS) by hybridization and/or amplicon methods. For probe-bait NGS, extracted RNA  
192 underwent 1<sup>st</sup> and 2<sup>nd</sup> strand cDNA synthesis (NEBNext® Ultra# II Non-Directional RNA  
193 Second Strand Synthesis Module, NEB, Ipswich, MA). Library construction was performed with  
194 KAPA Hyper Prep with KAPA HiFi HotStart Library Amplification Kit (Roche Diagnostics,  
195 Indianapolis, IN), with subsequent hybridization with SARS-CoV-2 bait probes (IDT, Coralville,  
196 CA) and were then sequenced on NextSeq (Illumina, San Diego, CA). Amplicon sequencing was  
197 performed using the CovidSeq kit and sequenced on NextSeq. Analysis tools include custom  
198 pipelines utilizing GATK and Mutect2 (Broad Institute) and Dragen SARS-COVID variant  
199 detection (Illumina). Viral sequences were strain-typed using Pangolin (43) and NextStrain  
200 criteria (44).

201 For comparison with wastewater findings, sequencing of nasal or nasopharyngeal swab  
202 extracted RNA from SARS-CoV-2 positive PCR samples from The Ohio State University  
203 Wexner Medical Center was performed. The laboratory received samples from sites across  
204 central Ohio, including all sites in this survey except Athens and Marietta. NGS was performed  
205 with CovidSeq as above or using the AmpliSeq SARS-CoV-2 Research Panel on Ion Chef-S5  
206 instruments (ThermoFisher, Waltham, MA). The lower limit of detection of a mutation for the  
207 amplicon methods was approximately 5% variant fraction at a mean depth of 200-1000 reads.

208

### 209 **3. Results and discussion**

#### 210 **3.1. Performance of the wastewater concentrating and detection methods**

211 A variety of methods have been adopted around the world to concentrate and quantify SARS-  
212 CoV-2 from wastewater. The reliability, reproducibility, and sensitivity of these methods needs  
213 to be validated to make better use of wastewater data (45). The performance of the two viral  
214 filtration and concentration methods in this study was evaluated by monthly recovery efficiency  
215 tests with three SARS-CoV-2 surrogates. MS2 is a non-enveloped bacteriophage widely used as  
216 a surrogate for viral pathogens (46-47). For a better understanding of the efficiency of the  
217 methods on SARs-CoV-2, two other enveloped coronaviruses (BCoV and OC43) were used in  
218 this study. The Concentrating Pipette (CP)-based concentration method was more effective than  
219 the ViroCap-based method, especially in recovery efficiency and speed. The time needed for the  
220 CP protocol was ten times shorter than the ViroCap-based method. The recovery efficiency of  
221 MS2 with the CP method (53.6%) was two times higher than that with the ViroCap-based  
222 method (24.7%). ViroCap was less effective in recovering enveloped coronaviruses from  
223 wastewater (BCoV: 7.2%). The recovery efficiency of BCoV with the CP-based method varied  
224 among the samples tested (ranged from 16.8% to 53.2%), indicating that the efficiency may be  
225 dependent on the characteristics of the wastewater matrix, such as the solid contents (48). To  
226 enhance the recovery efficiency and shorten the processing time, we switched to the CP-based  
227 protocol after the first month. One potential concern of this rapid CP method was that solids are  
228 removed prior to virus concentration. Since a previous study found that enveloped viruses tend to  
229 be more associated with the surface of solids in wastewater than non-enveloped viruses (49), the  
230 partitioning of the coronavirus surrogates in sample fractions was investigated for our methods.  
231 In the spiking test, only <0.2% of the BCoV was recovered from the pellet after centrifugation.  
232 Compared to the spiked BCoV, SARS-CoV-2 probably had longer residence time in wastewater,  
233 thus, higher percentage of SARS-CoV-2 (~10%) was found in the pellet portion. Since the

234 majority (~90%) of SARS-CoV-2 RNA signal was detected in the viral concentrate, the virus in  
235 the solid (pellet) portion of wastewater was not included in this study.

236 For accurate quantification of SARS-CoV-2 gene concentration, presence of PCR inhibition  
237 in the samples should be checked. In our study, no PCR Inhibition was detected. It might be due  
238 to two reasons: the Qiagen kit used for RNA extraction includes several inhibitor removal steps;  
239 and ddPCR is more robust in handling inhibition-prone environmental samples than conventional  
240 quantitative PCR (50).

### 241 **3.2. SARS-CoV-2 gene concentrations in wastewater**

242 During this 5-month study, three SARS-CoV-2 genes (N1, N2, and E gene) were detected in  
243 all 250 wastewater influents, with concentrations ranging from  $1 \times 10^2$  to  $1 \times 10^5$  gene copies/L  
244 of wastewater. The overall observed trend was that the SARS-CoV-2 gene concentrations  
245 stayed relatively stable at the initial stages of the study, increased rapidly in mid-October,  
246 peaked in late-November, and plateaued in December. This trend agrees with the COVID-19  
247 daily new confirmed case trend seen in Ohio (51).

248 In general, wastewater from Jackson Pike and Southerly, the two Columbus WWTPs,  
249 showed 1-15 times higher viral concentrations than that from the other utilities in smaller cities  
250 (Figure 2). By the end of 2020, Columbus had about 15-60 times more confirmed COVID-19  
251 cases than the other 7 cities, while the cumulative case incidence was at the same magnitude  
252 among all the sites (5,000-10,000 cases per million residents, Table 1). It is important to note  
253 that the variation of SARS-CoV-2 RNA concentration in wastewater among the sewersheds  
254 was not proportional to the variation in confirmed cases nor incidence. This finding suggests  
255 that wastewater is a complex matrix due to the variation in many factors, such as individual  
256 viral shedding amount and duration, RNA degradation rates, and migration of carriers. A

257 previous study proposed an estimation of the prevalence of COVID-19 infection within a  
258 catchment from SARS-CoV-2 gene copies in wastewater (14). Their model embedded other

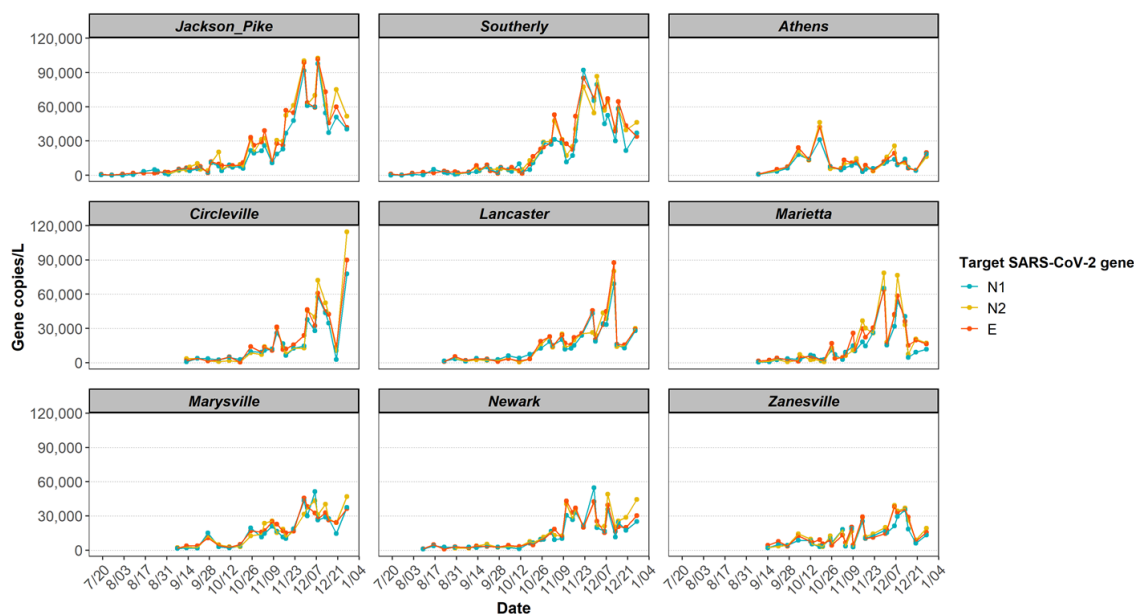

259 parameters of high uncertainty and variability, including flow rate and per capita production of  
260 wastewater, as well as viral shedding rate (14). Despite these potential uncertainties, we support  
261 that WBE is still a powerful tool in capturing the real-time infection trend in communities.

262 **Figure 2.** Longitudinal SARS-CoV-2 concentration trend in wastewater measured by N1, N2 and  
263 E genes from 9 wastewater catchments in Ohio in 2020.

264

### 265 3.3. Correlations between wastewater SARS-CoV-2 concentrations and COVID-19 cases

266 It is notable that the increased concentration of SARS-CoV-2 genes in wastewater during  
267 November and December 2020 coincided with the post-holiday COVID-19 surge, resulting from  
268 increased family gathering and travel. This result shows the usefulness of WBE in pinpointing  
269 epidemic hotspots (5). We hypothesized that the level of SARS-CoV-2 genes in wastewater  
270 correlate with the COVID-19 confirmed cases, so regression analyses were conducted for the  
271 nine sewersheds. Significant positive linear relationships were found between the wastewater

272 SARS-CoV-2 concentrations and the case numbers reported on the sampling date for all the  
273 sites, except Athens (Pearson's correlation coefficients ranged from 0.38 to 0.89, Figure S2h,  
274 Athens' data excluded from all correlation coefficients presented). Since both viral concentration  
275 and case data were highly skewed, violating the assumption of normality underlying the  
276 computation of the Pearson correlation coefficient (Figure S1), the non-parametric Spearman  
277 rank correlation coefficients were also computed. The correlation coefficients of COVID-19 case  
278 counts and the three different SARS-CoV-2 gene concentrations were presented in a heatmap  
279 (Figure 3c). The concentrations of all three SARS-CoV-2 genes were significantly, positively  
280 correlated with the daily confirmed cases for all sites, except Athens (Spearman's  $r$  ranged from  
281 0.48 to 0.87, all  $p < 0.05$ ), among which the N2 gene achieved the best performance, indicated  
282 by its highest average Spearman rank correlation coefficients (Spearman's  $r = 0.70$ ). The  
283 robustness of the N2 primer set in quantitative PCR is also shown in other studies, reporting that  
284 the primer binding region of the N2 gene is less prone to mutation (52). Therefore, the N2 gene  
285 concentrations were used for further statistical analysis.

286 During an emerging epidemic, a time lag of 3-9 days is typically observed from the onset of  
287 symptoms to case reporting, depending on the testing capacity, testing method, care-seeking  
288 behavior, and reporting speed (11, 53-54). In addition, the duration of viral shedding in human  
289 feces may vary among individuals (4, 55). To overcome these potential uncertainties, rolling  
290 averages of the confirmed new case data were calculated in replacement of the daily case  
291 numbers in this study. After averaging, the trend of case numbers was smoother and less noisy  
292 than the raw case numbers. This was observed in data from both big city, such as Southerly  
293 catchment of Columbus (Figure 3a), and small cities like Marietta (Figure 3b). Overlaid trend  
294 plots revealed good agreements between wastewater SARS-CoV-2 gene concentrations and new

295 case numbers (Figure S2a-S2g). Pearson (Figure S2i) and Spearman (Figure 3d) correlation  
296 coefficients both suggest that the averaged case numbers enhance the extent of relationships  
297 between the SARS-CoV-2 gene concentrations and reported COVID-19 cases. The sampling-  
298 date case number had the lowest coefficients among the four case types (averaged Spearman's  $r$   
299 of all 9 sites = 0.70). The 5-day rolling average of case number showed the highest Spearman  
300 rank correlation coefficient (average Spearman's  $r = 0.77$ ), followed by 7-day (averaged  
301 Spearman's  $r = 0.76$ ) and 3-day averages (average Spearman's  $r = 0.75$ ). As other studies  
302 pointed out that SARS-CoV-2 titers in wastewater may foreshadow the clinical results by 0-4  
303 days, we staggered our WBE trend by 3 days, but found no improvement in the correlations (11,  
304 56-57). It is important to note that the Ohio positive cases are assigned a date of the estimate of  
305 disease onset, instead of the test date or the test result date. Considering both sensitivity and  
306 precision, the 5-day rolling average of the confirmed new cases was used for understanding the  
307 effectiveness of estimating COVID-19 prevalence from wastewater viral concentrations.

308 The only non-correlating community, Athens, is a small college town with students  
309 accounting for 80% population during a university semester. The confirmed cases in Athens  
310 showed a different trend compared to other communities, with peak infection rates in mid-  
311 September and early October when students returned to campus, declined after that and much  
312 lower new case rate in November and December as students left campus by Thanksgiving  
313 holiday. Since most college students stay asymptomatic, the discrepancy between the wastewater  
314 data and new case data might be explained by an underestimation of the cases in the community,  
315 although more testing and analysis would have to be performed to confirm this hypothesis.

316 Among the nine sewersheds investigated, the wastewater data from four cities correlated  
317 remarkably well with the 5-day averaged new case numbers: Circleville WWTP (Spearman's  $r =$

318 0.88), Newark WWTP (Spearman's  $r = 0.86$ ), Marietta WWTP (Spearman's  $r = 0.85$ ), and  
 319 Jackson Pike WWTP (Spearman's  $r = 0.81$ ). These findings demonstrate that the wastewater can  
 320 be used to monitor the dynamic trend of COVID-19 disease in a community, regardless of the  
 321 population size and magnitude of confirmed cases.

322

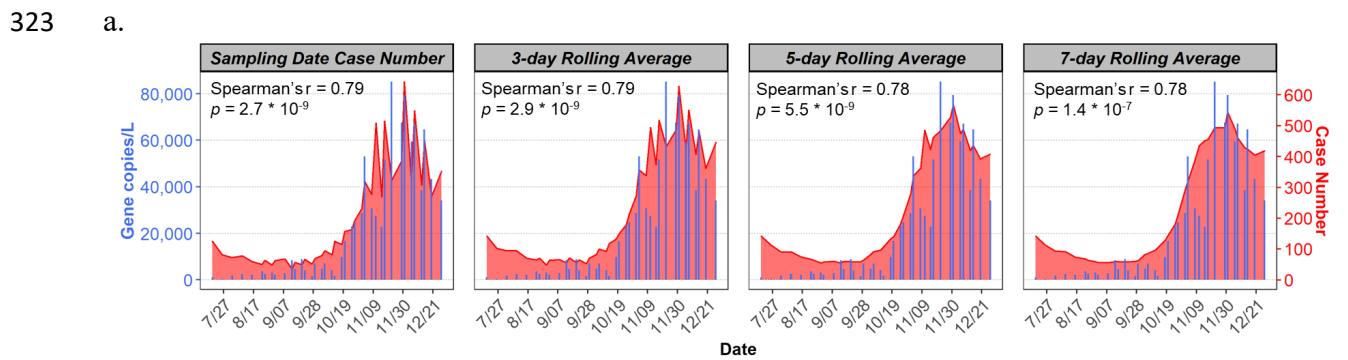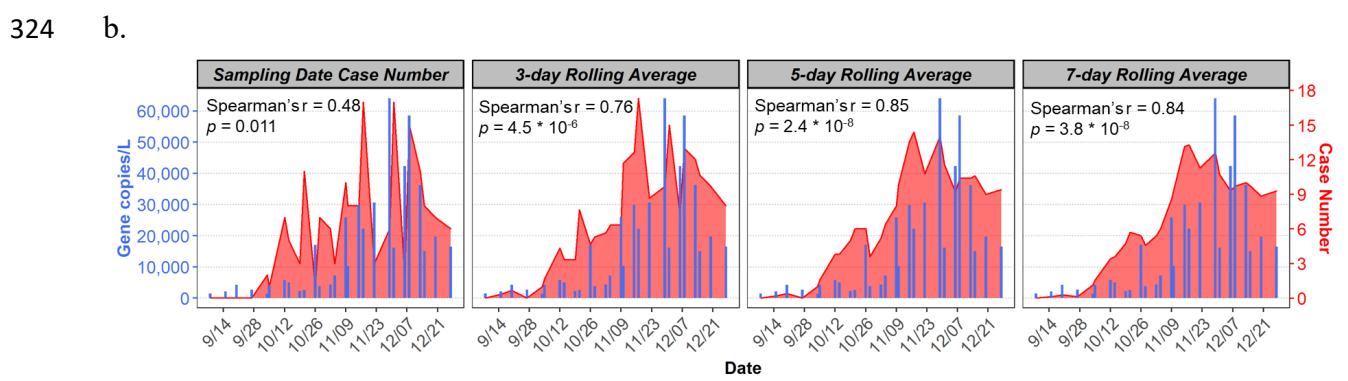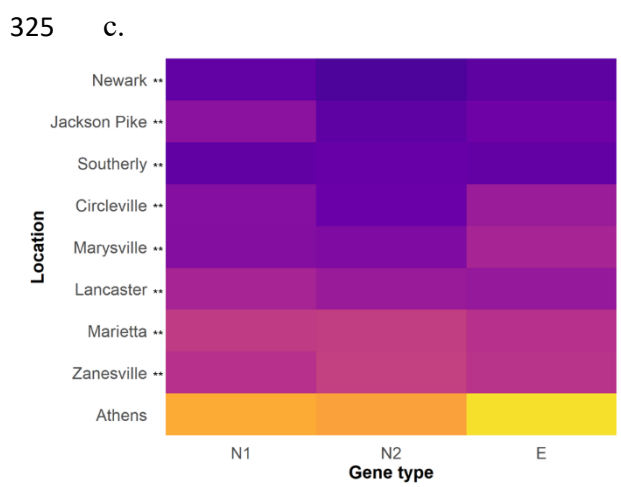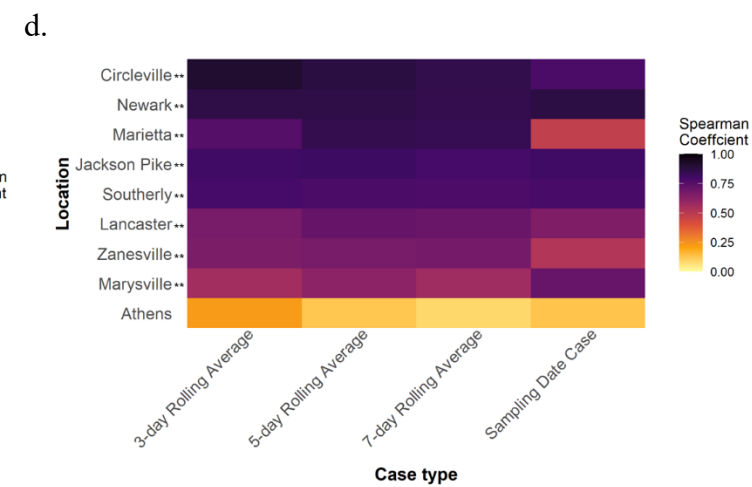

327 **Figure 3.** Relationships between SARS-CoV-2 gene concentration in wastewater and new  
 328 confirmed cases. Overlaid trend plots of SARS-CoV-2 N2 gene concentrations in wastewater



329 and case number of different averaging methods in: a) Southerly sewershed population; b)  
330 Marietta sewershed population; c) Spearman correlations of all sites by different genes; and d)  
331 Spearman correlations of all sites by case number of different averaging methods. Significant  
332 correlations (Spearman) were highlighted with two asterisks and one asterisk for  $p$ -value < 0.05  
333 and  $0.05 < p$ -value < 0.1, respectively.

334

### 335 **3.4. Estimation of COVID-19 cases via wastewater surveillance**

336 Although WBE can provide unbiased samples of the community by aggregating population  
337 health information, wastewater is known to have relatively high day-to-day variation in sewage  
338 flow and fecal strength (58). To account for the varying estimated fecal load over time and  
339 possible dilution due to rain, two human-specific fecal viruses, PMMoV and crAssphage, were  
340 quantified from Columbus wastewater to normalize the SARS-CoV-2 concentrations. These two  
341 viruses have been used as an internal reference for method validation due to their high  
342 persistence in water compared to other bacteria fecal indicators (25). Wastewater from the two  
343 Columbus sewersheds are a combined sewer (Table 1), which is more prone to dilution by  
344 stormwater events. For each sample analyzed, SARS-CoV-2 RNA concentrations were  
345 normalized with the concentrations of PMMoV (mean RNA concentration across the samples:  
346  $\sim 1 \times 10^6$  gene copies/L of wastewater) and crAssphage (mean DNA concentration across the  
347 samples:  $\sim 1 \times 10^8$  gene copies/L of wastewater). Both normalization approaches improved the  
348 agreement of the viral concentration and the case counts visually, especially before the change of  
349 method (first month) (Figure 4a). According to the Spearman rank correlation, the correlation  
350 between the viral titers and 5-day averaged case numbers was only marginally improved by the  
351 PMMoV-based normalization but not significant, whereas crAssphage-based normalization led  
352 to much weaker correlation.

353 Our data showed that normalization did not significantly improve wastewater signal  
354 correlation with cases during the study period. Although our sites represent a mixture of facilities  
355 with separate and combined sewers, during the sampling period we only observed one to three  
356 instances per facility where the flows were significantly increased (doubled) compared to the  
357 lowest flow recorded during sampling. This primarily occurred in December due to snowmelt  
358 (peak of new cases per day), or in August during rain events (new cases close to zero). We  
359 ponder that these low frequency precipitation events did not affect the sewer system much, thus  
360 normalization of SARS-CoV-2 gene concentrations with human fecal strength did not improve  
361 the correlations. In this regard, assumptions can be made that longitudinal wastewater data is  
362 robust to the variations in sewage flow and fecal strength when extreme precipitation events are  
363 infrequent. Our results agreed with the findings from other studies, which concluded that the  
364 PMMoV-normalized SARS-CoV-2 signal had lower background noise and showed the strongest  
365 correlation with active cases (57, 59). For future studies where normalization is required,  
366 combined markers of viral indicators, solid contents, and other volumetric parameters are  
367 recommended (60).

368 While clinical test results tend to be highly delayed and underestimated, wastewater enables  
369 the temporal mapping of the outbreak in a more timely and accurate manner (53). As more and  
370 more efforts are put into wastewater surveillance, population health data from wastewater is  
371 accumulating worldwide. To make better use of these wastewater information, we tested  
372 different models to help estimate COVID-19 prevalence from wastewater viral loads. First, a  
373 linear model was built ( $R^2$  based on raw N2 gene concentration in Southerly wastewater and 5-  
374 day averaged case number = 0.84). Surprisingly, neither normalization approaches enhanced the  
375 model (Figure 4b). As mentioned prior, the linear model is not ideal for our dataset and data

376 transformation hardly improved the normality. For a better estimation, polynomial models were  
377 built and evaluated. Both quadratic and cubic polynomial models achieved higher  $R^2$  than the  
378 corresponding linear model. Using the Southerly data as an example,  $R^2$  of 0.88 and 0.89,  
379 respectively were achieved (Figure 4c). The polynomial models also showed better adherence to  
380 normality. However, regression analysis indicated that the cubic polynomial model is not  
381 significantly superior to the quadratic model ( $p < 0.05$ ). Based on these results, it can be  
382 concluded that the quadratic model gave the best description of the relationship of new COVID-  
383 19 cases and viral titers in wastewater, while minimizing overfitting and the violation of  
384 normality. Similar to the case in the linear model, normalization did not improve the quadratic  
385 model (Figure 4c).

386 These results demonstrate that dynamic trend of COVID-19 within a community can be well  
387 estimated from longitudinal SARS-CoV-2 gene concentrations in wastewater. Polynomial  
388 models were built and optimized for the wastewater data from eight of the nine sewersheds. It  
389 has been reported that the viral titer in wastewater is more associated with the demographic  
390 variables, the household income and medical spend for example, than with population size (57).  
391 This may help explain the failure of estimating the disease prevalence with WBE data from  
392 Athens. For low-income areas with limited testing capability, it is recommended to take more  
393 demographic variables into account when using the WBE as a surveillance tool for the pandemic.  
394 Furthermore, recent studies and our preliminary data generated at the early stage of the pandemic  
395 (March to May; data now shown) suggested that WBE can be applied to communities of low  
396 prevalence (12). As new confirmed cases have been decreasing worldwide due to the  
397 implementation of vaccinations, more sensitive and robust methods will perform better in

398 determining SARS-CoV-2 genetic signals in wastewater in the areas with lower COVID-19  
 399 prevalence than before.

400 a.

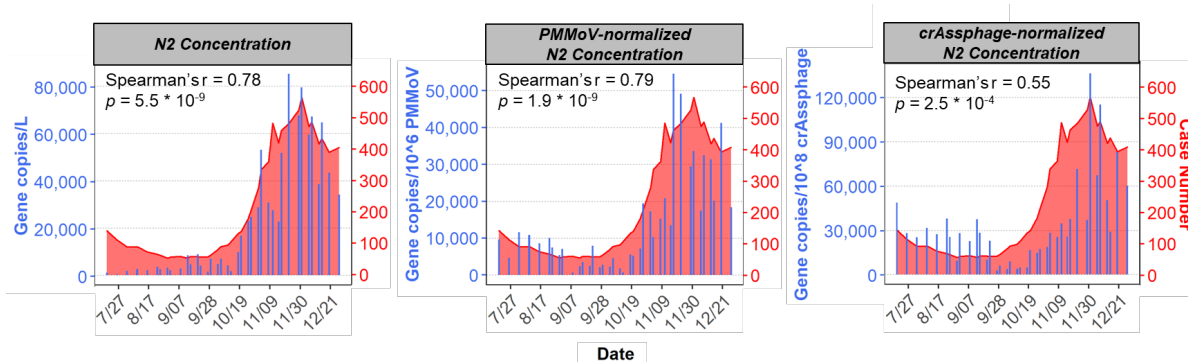

401 b.

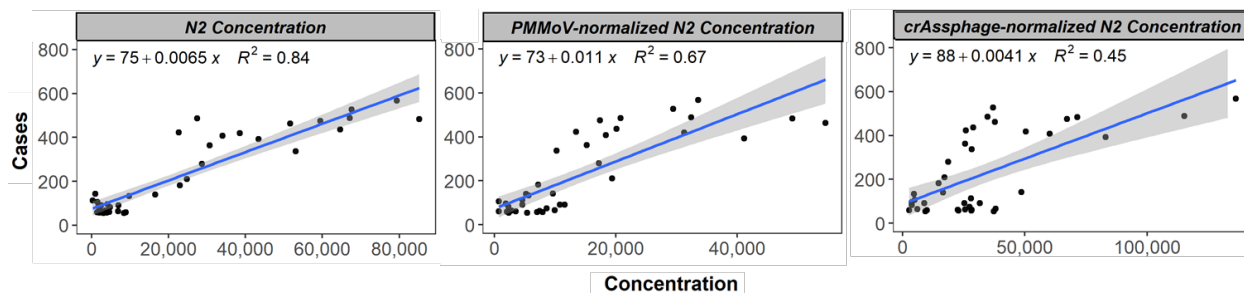

402 c.

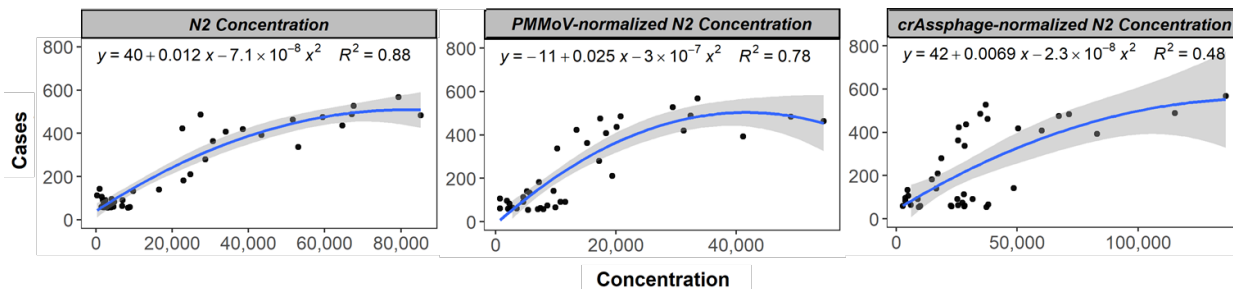

403 **Figure 4.** The effect of normalization with human fecal virus indicators on the relationships  
 404 between SARS-CoV-2 N2 gene concentration in wastewater and 5-day-rolling averages of new  
 405 confirmed cases. a) Overlaid trend plots of Southerly sewer-shed population; b) Linear regression  
 406 model; and c) Quadratic polynomial model.

407

408

409 **3.5. SARS-CoV-2 variant identification in wastewater**

410 Sequencing of the entire SARS-CoV-2 genome was performed on a subset of wastewater  
411 samples. Sequencing results differed among the 8 sites where wastewater samples were obtained  
412 over a 3-day period in early January 2021 (Table 2). It was reported that D614G variant  
413 dominated the global pandemic over the course of 1 month in March 2020, showing increased  
414 infectivity and viral shedding (61). Although all wastewater samples showed nearly 100%  
415 D614G mutation, there were variations in the levels of variants associated with the common  
416 clades including 20C/G (bearing Q57H), 20B (R203K) and 20A (S194L), with a predominance  
417 of clade C at most sites. In addition, there were low levels of other mutations associated with  
418 emerging strains, including L452R (associated with the B.1.427/429 strains from California) at  
419 Zanesville (10% variant allele frequency (VAF)) and Marietta (7% VAF), as well as N501Y at  
420 Jackson Pike (8% VAF). It is notable that wastewater samples from different sewersheds  
421 (Jackson Pike and Southerly) in the same city showed unique variant pattern, suggesting the  
422 feasibility of deploying wastewater monitoring for rapid detection of emerging variants  
423 circulating in each community. The result shows that detected SARS-CoV-2 variants in  
424 wastewater agreed well with the sequencing surveillance performed on SARS-CoV-2-positive  
425 nasal swabs (Table 2). For example, during January, a N501Y-bearing 20G strain (62) and the  
426 B.1.1.429 strain (63) were first detected at low levels in nasopharyngeal swab surveillance  
427 samples. Studies have found increased infectivity and transmissibility as well as decreased  
428 antibody neutralization in pseudoviruses carrying both L452R and N501Y mutations compared  
429 to the D614G alone (64-65). Overall, this study showed the feasibility of identifying circulating  
430 SARS-CoV-2 strains in various communities from wastewater.

431 **Table 2:** Differential detection of SARS-CoV-2 strain-defining mutations by genomic sequencing in wastewater across Ohio over a  
 432 3-day period in early January 2021.

| Amino acid change        | Nucleotide change | Strain/lineage with mutation | Detection frequency in NP swabs <sup>3</sup> | Variant allele frequency (VAF) |              |           |        |          |            |             |           |
|--------------------------|-------------------|------------------------------|----------------------------------------------|--------------------------------|--------------|-----------|--------|----------|------------|-------------|-----------|
|                          |                   |                              |                                              | Marysville                     | Jackson Pike | Southerly | Athens | Marietta | Zanesville | Circleville | Lancaster |
| S: D614G <sup>1</sup>    | c.1841A>G         | B.1, clades A,B,C            | 100%                                         | 0.97                           | 0.97         | 0.98      | 0.95   | 0.95     | 0.96       | 0.98        | 0.97      |
| ORF3A: Q57H <sup>2</sup> | c.171G>T          | B.1, 20C/G clade             | 95%                                          | 0.88                           | 0.73         | 0.80      | 0.43   | 0.91     | 0.89       | 0.77        | 0.80      |
| N: R203K                 | c.608G>A          | B.1, 20B clade               | 3%                                           | nd                             | nd           | nd        | 0.19   | nd       | nd         | nd          | nd        |
| N: S194L                 | c.581C>T          | B.1, 20A clade               | 2%                                           | nd                             | nd           | nd        | 0.24   | nd       | nd         | 0.14        | 0.07      |
| S: N501Y                 | c.1501A>T         | B.1.2/501Y                   | 4%                                           | nd                             | 0.08         | nd        | nd     | nd       | nd         | nd          | nd        |
| S: S477N                 | c.1430G>A         | B.1.1.298 & B.1.404          | <1%                                          | nd                             | nd           | 0.16      | nd     | nd       | nd         | 0.08        | nd        |
| S: L452R                 | c.1355T>G         | B.1.1.427 & B.1.1.429        | 1%                                           | nd                             | nd           | 0.06      | nd     | 0.07     | 0.10       | nd          | nd        |
| S: P681H                 | c.2042C>A         | B.1.1.222 & B.1.1.7          | 3%                                           | nd                             | nd           | 0.09      | nd     | nd       | nd         | 0.18        | nd        |
| N: Q9H                   | c.27G>T           | B.1, 20C subset              | 4%                                           | nd                             | 0.14         | nd        | 0.14   | 0.08     | 0.07       | nd          | nd        |

433 <sup>1</sup>Allele fraction was well-correlated with other B.1 markers including the 5'UTR C241T, nsp3 p.F106F (c.318C>T) and nsp12 p.P323L (c.968C>T).

434 <sup>2</sup>Allele fraction was well-correlated with clade 20C/G marker nsp2 p.T85I (c.254C>T).

435 <sup>3</sup>SARS-CoV-2-positive nasal or nasopharyngeal (NP) swabs collected in January 2021.

### 436 **3.6. Significance of this work**

437 This study demonstrates the effectiveness of wastewater surveillance in COVID-19 trend  
438 tracking in various communities. SARS-CoV-2 gene concentrations in wastewater strongly  
439 correlated with the COVID-19 cases. This is the first study proposing the use of a quadratic  
440 polynomial model to track and predict COVID-19 cases from wastewater surveillance data,  
441 which can benefit the communities with limited human testing capability. In the later stage of the  
442 pandemic, WBE can help evaluate the effectiveness of vaccination and prioritize the distribution  
443 of human testing resources. Moreover, as sequencing results from wastewater samples in early  
444 2021 at a time of new strain emergence shows an agreement with the sequencing results from  
445 clinical nasal swab samples, we suggest that the wastewater matrix is an ideal sample for fast  
446 tracking variant emergence and transmission within a community.

447

### 448 **4. Acknowledgments**

449 This study was supported by funding from Ohio Environmental Protection Agency's  
450 Coronavirus Aid, Relief, and Economic Security (CARES) Act (JL, ZB, SL) and an  
451 Interdisciplinary Research Seed Grant from The Ohio State University Infectious Diseases  
452 Institute (DJ, HT, JL). Genomic surveillance of nasal swabs was performed under an IRB-  
453 approved surveillance protocol (DJ). This research could not be completed without the  
454 collaboration with participating wastewater treatment plants in Ohio. We thank Pam Snyder,  
455 Sarah Corcoran, and Charlie Andorka at The Ohio State University for their assistance in sample  
456 processing and collection and Preeti Pancholi, Sara Koenig and Peter Mohler for logistical

457 support. We appreciate the great support from Rebecca Fugitt at Ohio Department of Health  
458 during this study.

459

## 460 5. Declaration of Interests

461 The authors declare no competing interests.

462

## 463 6. References

464 1. Hu, B., Guo, H., Zhou, P., Shi, Z.-L., 2021. Characteristics of SARS-CoV-2 and COVID-  
465 19. *Nat. Rev. Microbiol.* 19, 141–154. <https://doi.org/10.1038/s41579-020-00459-7>

466 2. World Health Organization (WHO), 2021. WHO Coronavirus Disease (COVID-19)  
467 Dashboard [Online]. URL <https://covid19.who.int> (accessed 3.3.21).

468 3. Liu, J., Liao, X., Qian, S., Yuan, J., Wang, F., Liu, Y., Wang, Z., Wang, F.-S., Liu, L.,  
469 Zhang, Z., 2020. Community Transmission of Severe Acute Respiratory Syndrome  
470 Coronavirus 2, Shenzhen, China, 2020. *Emerg. Infect. Dis.* 26, 1320–1323.  
471 <https://doi.org/10.3201/eid2606.200239>

472 4. He, X., Lau, E.H.Y., Wu, P., Deng, X., Wang, J., Hao, X., Lau, Y.C., Wong, J.Y., Guan,  
473 Y., Tan, X., Mo, X., Chen, Y., Liao, B., Chen, W., Hu, F., Zhang, Q., Zhong, M., Wu, Y.,  
474 Zhao, L., Zhang, F., Cowling, B.J., Li, F., Leung, G.M., 2020. Temporal dynamics in  
475 viral shedding and transmissibility of COVID-19. *Nat. Med.* 26, 672–675.  
476 <https://doi.org/10.1038/s41591-020-0869-5>



- 477 5. Hart, O.E., Halden, R.U., 2020. Computational analysis of SARS-CoV-2/COVID-19  
478 surveillance by wastewater-based epidemiology locally and globally: Feasibility,  
479 economy, opportunities and challenges. *Sci. Total Environ.* 730, 138875.  
480 <https://doi.org/10.1016/j.scitotenv.2020.138875>
- 481 6. ODH, 2021. COVID-19 Dashborad: Ohio Coronavirus Wastewater Monitoring Network  
482 [Online]. URL  
483 [https://public.tableau.com/views/COVIDWastewater/Dashboard2?:embed=y&:showViz](https://public.tableau.com/views/COVIDWastewater/Dashboard2?:embed=y&:showVizHome=no&:host_url=https%3A%2F%2Fpublic.tableau.com%2F&:embed_code_version=3&:tabs=no&:toolbar=yes&:display_count=yes&:language=en&:loadOrderID=0)  
484 [Home=no&:host\\_url=https%3A%2F%2Fpublic.tableau.com%2F&:embed\\_code\\_version](https://public.tableau.com/views/COVIDWastewater/Dashboard2?:embed=y&:showVizHome=no&:host_url=https%3A%2F%2Fpublic.tableau.com%2F&:embed_code_version=3&:tabs=no&:toolbar=yes&:display_count=yes&:language=en&:loadOrderID=0)  
485 [=3&:tabs=no&:toolbar=yes&:display\\_count=yes&:language=en&:loadOrderID=0](https://public.tableau.com/views/COVIDWastewater/Dashboard2?:embed=y&:showVizHome=no&:host_url=https%3A%2F%2Fpublic.tableau.com%2F&:embed_code_version=3&:tabs=no&:toolbar=yes&:display_count=yes&:language=en&:loadOrderID=0)  
486 (accessed 3.3.21).
- 487 7. Sims, N., Kasprzyk-Hordern, B., 2020. Future perspectives of wastewater-based  
488 epidemiology: Monitoring infectious disease spread and resistance to the community  
489 level. *Environ. Int.* 139, 105689. <https://doi.org/10.1016/j.envint.2020.105689>
- 490 8. Cheung, K.S., Hung, I.F.N., Chan, P.P.Y., Lung, K.C., Tso, E., Liu, R., Ng, Y.Y., Chu,  
491 M.Y., Chung, T.W.H., Tam, A.R., Yip, C.C.Y., Leung, K.-H., Fung, A.Y.-F., Zhang,  
492 R.R., Lin, Y., Cheng, H.M., Zhang, A.J.X., To, K.K.W., Chan, K.-H., Yuen, K.-Y.,  
493 Leung, W.K., 2020. Gastrointestinal Manifestations of SARS-CoV-2 Infection and Virus  
494 Load in Fecal Samples From a Hong Kong Cohort: Systematic Review and Meta-  
495 analysis. *Gastroenterology* 159, 81–95. <https://doi.org/10.1053/j.gastro.2020.03.065>
- 496 9. Wang, X., Zheng, J., Guo, L., Yao, H., Wang, L., Xia, X., Zhang, W., 2020. Fecal viral  
497 shedding in COVID-19 patients: Clinical significance, viral load dynamics and survival  
498 analysis. *Virus Res.* 289, 198147. <https://doi.org/10.1016/j.virusres.2020.198147>

- 499 10. Medema, G., Heijnen, L., Elsinga, G., Italiaander, R., Brouwer, A., 2020. Presence of  
500 SARS-Coronavirus-2 in sewage (preprint). *Occupational and Environmental Health*.  
501 <https://doi.org/10.1101/2020.03.29.20045880>
- 502 11. Nemudryi, A., Nemudraia, A., Wiegand, T., Surya, K., Buyukyoruk, M., Cicha, C.,  
503 Vanderwood, K.K., Wilkinson, R., Wiedenheft, B., 2020. Temporal Detection and  
504 Phylogenetic Assessment of SARS-CoV-2 in Municipal Wastewater. *Cell Rep. Med.* 1,  
505 100098. <https://doi.org/10.1016/j.xcrm.2020.100098>
- 506 12. Randazzo, W., Truchado, P., Cuevas-Ferrando, E., Simón, P., Allende, A., Sánchez, G.,  
507 2020. SARS-CoV-2 RNA in wastewater anticipated COVID-19 occurrence in a low  
508 prevalence area. *Water Res.* 181, 115942. <https://doi.org/10.1016/j.watres.2020.115942>
- 509 13. Wurtzer, S., Marechal, V., Mouchel, J., Maday, Y., Teyssou, R., Richard, E., Almayrac,  
510 J., Moulin, L., 2020. Evaluation of lockdown impact on SARS-CoV-2 dynamics through  
511 viral genome quantification in Paris wastewaters (preprint). *Epidemiology*.  
512 <https://doi.org/10.1101/2020.04.12.20062679>
- 513 14. Ahmed, W., Angel, N., Edson, J., Bibby, K., Bivins, A., O'Brien, J.W., Choi, P.M.,  
514 Kitajima, M., Simpson, S.L., Li, J., Tscharke, B., Verhagen, R., Smith, W.J.M., Zaugg,  
515 J., Dierens, L., Hugenholtz, P., Thomas, K.V., Mueller, J.F., 2020a. First confirmed  
516 detection of SARS-CoV-2 in untreated wastewater in Australia: A proof of concept for  
517 the wastewater surveillance of COVID-19 in the community. *Sci. Total Environ.* 728,  
518 138764. <https://doi.org/10.1016/j.scitotenv.2020.138764>

- 519 15. Lodder, W., Husman, A.M. de R., 2020. SARS-CoV-2 in wastewater: potential health  
520 risk, but also data source. *Lancet Gastroenterol. Hepatol.* 5, 533–534.  
521 [https://doi.org/10.1016/S2468-1253\(20\)30087-X](https://doi.org/10.1016/S2468-1253(20)30087-X)
- 522 16. Rosa, G.L., Iaconelli, M., Mancini, P., Ferraro, G.B., Bonadonna, L., Lucentini, L.,  
523 Suffredini, E., n.d. FIRST DETECTION OF SARS-COV-2 IN UNTREATED  
524 WASTEWATERS IN ITALY 17.
- 525 17. Wu, F., Zhang, J., Xiao, A., Gu, X., Lee, W.L., Armas, F., Kauffman, K., Hanage, W.,  
526 Matus, M., Ghaeli, N., Endo, N., Duvallet, C., Poyet, M., Moniz, K., Washburne, A.D.,  
527 Erickson, T.B., Chai, P.R., Thompson, J., Alm, E.J., 2020b. SARS-CoV-2 Titers in  
528 Wastewater Are Higher than Expected from Clinically Confirmed Cases. *mSystems* 5.  
529 <https://doi.org/10.1128/mSystems.00614-20>
- 530 18. Kevin, L., 2020. Back log of test results causes delayed COVID-19 numbers reported by  
531 ODH [Online]. URL [https://www.10tv.com/article/news/health/coronavirus/back-log-of-](https://www.10tv.com/article/news/health/coronavirus/back-log-of-test-results-causes-delayed-covid-19-numbers-reported-by-odh/530-2e377780-687b-4ee2-b7fb-8f9991bb15d0)  
532 [test-results-causes-delayed-covid-19-numbers-reported-by-odh/530-2e377780-687b-](https://www.10tv.com/article/news/health/coronavirus/back-log-of-test-results-causes-delayed-covid-19-numbers-reported-by-odh/530-2e377780-687b-4ee2-b7fb-8f9991bb15d0)  
533 [4ee2-b7fb-8f9991bb15d0](https://www.10tv.com/article/news/health/coronavirus/back-log-of-test-results-causes-delayed-covid-19-numbers-reported-by-odh/530-2e377780-687b-4ee2-b7fb-8f9991bb15d0) (accessed 3.11.21).
- 534 19. Richterich, P., 2020. Severe underestimation of COVID-19 case numbers: effect of  
535 epidemic growth rate and test restrictions (preprint). *Infectious Diseases (except*  
536 *HIV/AIDS)*. <https://doi.org/10.1101/2020.04.13.20064220>
- 537 20. Ahmed, W., Tschärke, B., Bertsch, P.M., Bibby, K., Bivins, A., Choi, P., Clarke, L.,  
538 Dwyer, J., Edson, J., Nguyen, T.M.H., O'Brien, J.W., Simpson, S.L., Sherman, P.,  
539 Thomas, K.V., Verhagen, R., Zaugg, J., Mueller, J.F., 2021. SARS-CoV-2 RNA  
540 monitoring in wastewater as a potential early warning system for COVID-19

541 transmission in the community: A temporal case study. *Sci. Total Environ.* 761, 144216.

542 <https://doi.org/10.1016/j.scitotenv.2020.144216>

543 21. Fontenele, R.S., Kraberger, S., Hadfield, J., Driver, E.M., Bowes, D., Holland, L.A.,  
544 Faleye, T.O.C., Adhikari, S., Kumar, R., Inchausti, R., Holmes, W.K., Deitrick, S.,  
545 Brown, P., Duty, D., Smith, T., Bhatnagar, A., Yeager, R.A., Holm, R.H., Reitzenstein,  
546 N.H. von, Wheeler, E., Dixon, K., Constantine, T., Wilson, M.A., Lim, E.S., Jiang, X.,  
547 Halden, R.U., Scotch, M., Varsani, A., 2021. High-throughput sequencing of SARS-  
548 CoV-2 in wastewater provides insights into circulating variants. medRxiv

549 2021.01.22.21250320. <https://doi.org/10.1101/2021.01.22.21250320>

550 22. Jahn, K., Dreifuss, D., Topolsky, I., Kull, A., Ganesanandamoorthy, P., Fernandez-Cassi,  
551 X., Bänziger, C., Stachler, E., Fuhrmann, L., Jablonski, K.P., Chen, C., Aquino, C.,  
552 Stadler, T., Ort, C., Kohn, T., Julian, T.R., Beerenwinkel, N., 2021. Detection of SARS-  
553 CoV-2 variants in Switzerland by genomic analysis of wastewater samples. medRxiv

554 2021.01.08.21249379. <https://doi.org/10.1101/2021.01.08.21249379>

555 23. Martin, J., Klapsa, D., Wilton, T., Zambon, M., Bentley, E., Bujaki, E., Fritzsche, M.,  
556 Mate, R., Majumdar, M., 2020. Tracking SARS-CoV-2 in Sewage: Evidence of Changes  
557 in Virus Variant Predominance during COVID-19 Pandemic. *Viruses* 12, 1144.

558 <https://doi.org/10.3390/v12101144>

559 24. Daughton, C.G., 2012. Using biomarkers in sewage to monitor community-wide human  
560 health: Isoprostanes as conceptual prototype. *Sci. Total Environ.* 424, 16–38.

561 <https://doi.org/10.1016/j.scitotenv.2012.02.038>

- 562 25. Greaves, J., Stone, D., Wu, Z., Bibby, K., 2020. Persistence of emerging viral fecal  
563 indicators in large-scale freshwater mesocosms. *Water Res.* X 9, 100067.  
564 <https://doi.org/10.1016/j.wroa.2020.100067>
- 565 26. Hamza, I.A., Jurzik, L., Überla, K., Wilhelm, M., 2011. Evaluation of pepper mild mottle  
566 virus, human picobirnavirus and Torque teno virus as indicators of fecal contamination in  
567 river water. *Water Res.* 45, 1358–1368. <https://doi.org/10.1016/j.watres.2010.10.021>
- 568 27. Malla, B., Ghaju Shrestha, R., Tandukar, S., Sherchand, J.B., Haramoto, E., 2019.  
569 Performance Evaluation of Human-Specific Viral Markers and Application of Pepper  
570 Mild Mottle Virus and CrAssphage to Environmental Water Samples as Fecal Pollution  
571 Markers in the Kathmandu Valley, Nepal. *Food Environ. Virol.* 11, 274–287.  
572 <https://doi.org/10.1007/s12560-019-09389-x>
- 573 28. Symonds, E.M., Nguyen, K.H., Harwood, V.J., Breitbart, M., 2018. Pepper mild mottle  
574 virus: A plant pathogen with a greater purpose in (waste)water treatment development  
575 and public health management. *Water Res.* 144, 1–12.  
576 <https://doi.org/10.1016/j.watres.2018.06.066>
- 577 29. U.S. Department of Commerce, 2019. U.S. Census Bureau QuickFacts: United States  
578 [Online]. URL <https://www.census.gov/quickfacts/fact/table/US/PST045219> (accessed  
579 3.9.21).
- 580 30. Bennett, H.B., O'Dell, H.D., Norton, G., Shin, G., Hsu, F.-C., Meschke, J.S., 2010.  
581 Evaluation of a novel electropositive filter for the concentration of viruses from diverse  
582 water matrices. *Water Sci. Technol. J. Int. Assoc. Water Pollut. Res.* 61, 317–322.  
583 <https://doi.org/10.2166/wst.2010.819>

- 584 31. Innovaprep, 2020. Concentrating Pipette Select: Wastewater Application Note Revision  
585 B (p. 2) [Online]. URL [https://uploads-](https://uploads-ssl.webflow.com/57aa3257c3e841c509f276e2/5f888d1b3bddf35ae661965c_CONCENTRATINGPIPETTESELECT%20WASTEWATER%20APPLICATION%20NOTE%2017.03%20PM-compressed.pdf)  
586 [ssl.webflow.com/57aa3257c3e841c509f276e2/5f888d1b3bddf35ae661965c\\_CONCENT](https://uploads-ssl.webflow.com/57aa3257c3e841c509f276e2/5f888d1b3bddf35ae661965c_CONCENTRATINGPIPETTESELECT%20WASTEWATER%20APPLICATION%20NOTE%2017.03%20PM-compressed.pdf)  
587 [RATINGPIPETTESELECT%20WASTEWATER%20APPLICATION%20NOTE%201](https://uploads-ssl.webflow.com/57aa3257c3e841c509f276e2/5f888d1b3bddf35ae661965c_CONCENTRATINGPIPETTESELECT%20WASTEWATER%20APPLICATION%20NOTE%2017.03%20PM-compressed.pdf)  
588 [7.03%20PM-compressed.pdf](https://uploads-ssl.webflow.com/57aa3257c3e841c509f276e2/5f888d1b3bddf35ae661965c_CONCENTRATINGPIPETTESELECT%20WASTEWATER%20APPLICATION%20NOTE%2017.03%20PM-compressed.pdf) (accessed 3.3.21).
- 589 32. Bae, J., Schwab, K.J., 2008. Evaluation of Murine Norovirus, Feline Calicivirus,  
590 Poliovirus, and MS2 as Surrogates for Human Norovirus in a Model of Viral Persistence  
591 in Surface Water and Groundwater. *Appl. Environ. Microbiol.* 74, 477–484.  
592 <https://doi.org/10.1128/AEM.02095-06>
- 593 33. Cimolai, N., 2020. Environmental and decontamination issues for human coronaviruses  
594 and their potential surrogates. *J. Med. Virol.* 92, 2498–2510.  
595 <https://doi.org/10.1002/jmv.26170>
- 596 34. Hirotsu, Y., Mochizuki, H., Omata, M., 2020. Double-Quencher Probes Improved the  
597 Detection Sensitivity of Severe Acute Respiratory Syndrome Coronavirus 2 (SARS-CoV-  
598 2) by One-Step RT-PCR. medRxiv 2020.03.17.20037903.  
599 <https://doi.org/10.1101/2020.03.17.20037903>
- 600 35. Jung, Y.J., Park, G.-S., Moon, J.H., Ku, K., Beak, S.-H., Kim, S., Park, E.C., Park, D.,  
601 Lee, J.-H., Byeon, C.W., Lee, J.J., Maeng, J.-S., Kim, S.J., Kim, S.I., Kim, B.-T., Lee,  
602 M.J., Kim, H.G., 2020. Comparative analysis of primer-probe sets for the laboratory  
603 confirmation of SARS-CoV-2. bioRxiv 2020.02.25.964775.  
604 <https://doi.org/10.1101/2020.02.25.964775>

- 605 36. Corman, V.M., Landt, O., Kaiser, M., Molenkamp, R., Meijer, A., Chu, D.K., Bleicker,  
606 T., Brünink, S., Schneider, J., Schmidt, M.L., Mulders, D.G., Haagmans, B.L., Veer, B.  
607 van der, Brink, S. van den, Wijsman, L., Goderski, G., Romette, J.-L., Ellis, J., Zambon,  
608 M., Peiris, M., Goossens, H., Reusken, C., Koopmans, M.P., Drosten, C., 2020. Detection  
609 of 2019 novel coronavirus (2019-nCoV) by real-time RT-PCR. *Eurosurveillance* 25,  
610 2000045. <https://doi.org/10.2807/1560-7917.ES.2020.25.3.2000045>
- 611 37. Dare, R.K., Fry, A.M., Chittaganpitch, M., Sawanpanyalert, P., Olsen, S.J., Erdman,  
612 D.D., 2007. Human Coronavirus Infections in Rural Thailand: A Comprehensive Study  
613 Using Real-Time Reverse-Transcription Polymerase Chain Reaction Assays. *J. Infect.*  
614 *Dis.* 196, 1321–1328. <https://doi.org/10.1086/521308>
- 615 38. Decaro, N., Elia, G., Campolo, M., Desario, C., Mari, V., Radogna, A., Colaianni, M.L.,  
616 Cirone, F., Tempesta, M., Buonavoglia, C., 2008. Detection of bovine coronavirus using  
617 a TaqMan-based real-time RT-PCR assay. *J. Virol. Methods* 151, 167–171.  
618 <https://doi.org/10.1016/j.jviromet.2008.05.016>
- 619 39. Haramoto, E., Kitajima, M., Kishida, N., Konno, Y., Katayama, H., Asami, M., Akiba,  
620 M., 2013. Occurrence of Pepper Mild Mottle Virus in Drinking Water Sources in Japan.  
621 *Appl. Environ. Microbiol.* 79, 7413–7418. <https://doi.org/10.1128/AEM.02354-13>
- 622 40. Ogorzaly, L., Gantzer, C., 2006. Development of real-time RT-PCR methods for specific  
623 detection of F-specific RNA bacteriophage genogroups: Application to urban raw  
624 wastewater. *J. Virol. Methods* 138, 131–139.  
625 <https://doi.org/10.1016/j.jviromet.2006.08.004>

- 626 41. Stachler, E., Kelty, C., Sivaganesan, M., Li, X., Bibby, K., Shanks, O.C., 2017.  
627 Quantitative CrAssphage PCR Assays for Human Fecal Pollution Measurement. *Environ.*  
628 *Sci. Technol.* 51, 9146–9154. <https://doi.org/10.1021/acs.est.7b02703>
- 629 42. Johnson, D.R., Lee, P.K.H., Holmes, V.F., Alvarez-Cohen, L., 2005. An internal  
630 reference technique for accurately quantifying specific mRNAs by real-time PCR with  
631 application to the *tceA* reductive dehalogenase gene. *Appl. Environ. Microbiol.* 71,  
632 3866–3871. <https://doi.org/10.1128/AEM.71.7.3866-3871.2005>
- 633 43. Rambaut, A., Holmes, E.C., O’Toole, Á., Hill, V., McCrone, J.T., Ruis, C., du Plessis, L.,  
634 Pybus, O.G., 2020. A dynamic nomenclature proposal for SARS-CoV-2 lineages to assist  
635 genomic epidemiology. *Nat. Microbiol.* 5, 1403–1407. [https://doi.org/10.1038/s41564-](https://doi.org/10.1038/s41564-020-0770-5)  
636 [020-0770-5](https://doi.org/10.1038/s41564-020-0770-5)
- 637 44. Bedford, T., Hodcroft, E., Neher, R., n.d. Updated Nextstrain SARS-CoV-2 clade naming  
638 strategy [Online]. Updat. Nextstrain SARS-CoV-2 Clade Naming Strategy. URL  
639 <https://nextstrain.org//blog/2021-01-06-updated-SARS-CoV-2-clade-naming> (accessed  
640 4.14.21).
- 641 45. M. Pecson, B., Darby, E., N. Haas, C., M. Amha, Y., Bartolo, M., Danielson, R.,  
642 Dearborn, Y., Giovanni, G.D., Ferguson, C., Fevig, S., Gaddis, E., Gray, D., Lukasik, G.,  
643 Mull, B., Olivas, L., Olivieri, A., Qu, Y., Consortium, S.-C.-2 I., 2021. Reproducibility  
644 and sensitivity of 36 methods to quantify the SARS-CoV-2 genetic signal in raw  
645 wastewater: findings from an interlaboratory methods evaluation in the U.S. *Environ. Sci.*  
646 *Water Res. Technol.* <https://doi.org/10.1039/D0EW00946F>



- 647 46. Dawson, D.J., Paish, A., Staffell, L.M., Seymour, I.J., Appleton, H., 2005. Survival of  
648 viruses on fresh produce, using MS2 as a surrogate for norovirus. *J. Appl. Microbiol.* 98,  
649 203–209. <https://doi.org/10.1111/j.1365-2672.2004.02439.x>
- 650 47. Lin, K., Marr, L.C., 2017. Aerosolization of Ebola Virus Surrogates in Wastewater  
651 Systems. *Environ. Sci. Technol.* 51, 2669–2675. <https://doi.org/10.1021/acs.est.6b04846>
- 652 48. Ahmed, W., Bertsch, P.M., Bivins, A., Bibby, K., Farkas, K., Gathercole, A., Haramoto,  
653 E., Gyawali, P., Korajkic, A., McMinn, B.R., Mueller, J.F., Simpson, S.L., Smith,  
654 W.J.M., Symonds, E.M., Thomas, K.V., Verhagen, R., Kitajima, M., 2020b. Comparison  
655 of virus concentration methods for the RT-qPCR-based recovery of murine hepatitis  
656 virus, a surrogate for SARS-CoV-2 from untreated wastewater. *Sci. Total Environ.* 739,  
657 139960. <https://doi.org/10.1016/j.scitotenv.2020.139960>
- 658 49. Ye, Y., Ellenberg, R.M., Graham, K.E., Wigginton, K.R., 2016. Survivability,  
659 Partitioning, and Recovery of Enveloped Viruses in Untreated Municipal Wastewater.  
660 *Environ. Sci. Technol.* 50, 5077–5085. <https://doi.org/10.1021/acs.est.6b00876>
- 661 50. Sedlak, R.H., Kuypers, J., Jerome, K.R., 2014. A multiplexed droplet digital PCR assay  
662 performs better than qPCR on inhibition prone samples. *Diagn. Microbiol. Infect. Dis.*  
663 80, 285–286. <https://doi.org/10.1016/j.diagmicrobio.2014.09.004>
- 664 51. CDC, 2020a. COVID Data Tracker [Online]. *Cent. Dis. Control Prev.* URL  
665 <https://covid.cdc.gov/covid-data-tracker> (accessed 3.10.21).
- 666 52. Rahman, M.S., Islam, M.R., Alam, A.S.M.R.U., Islam, I., Hoque, M.N., Akter, S.,  
667 Rahaman, M.M., Sultana, M., Hossain, M.A., 2021. Evolutionary dynamics of SARS-

- 668 CoV-2 nucleocapsid protein and its consequences. *J. Med. Virol.* 93, 2177–2195.  
669 <https://doi.org/10.1002/jmv.26626>
- 670 53. Garg, S., Kim, L., Whitaker, M., O’Halloran, A., Cummings, C., Holstein, R., Prill, M.,  
671 Chai, S.J., Kirley, P.D., Alden, N.B., Kawasaki, B., Yousey-Hindes, K., Niccolai, L.,  
672 Anderson, E.J., Openo, K.P., Weigel, A., Monroe, M.L., Ryan, P., Henderson, J., Kim,  
673 S., Como-Sabetti, K., Lynfield, R., Sosin, D., Torres, S., Muse, A., Bennett, N.M.,  
674 Billing, L., Sutton, M., West, N., Schaffner, W., Talbot, H.K., Aquino, C., George, A.,  
675 Budd, A., Brammer, L., Langley, G., Hall, A.J., Fry, A., 2020. Hospitalization Rates and  
676 Characteristics of Patients Hospitalized with Laboratory-Confirmed Coronavirus Disease  
677 2019 — COVID-NET, 14 States, March 1–30, 2020. *Morb. Mortal. Wkly. Rep.* 69, 458–  
678 464. <https://doi.org/10.15585/mmwr.mm6915e3>
- 679 54. Silverman, J.D., Hupert, N., Washburne, A.D., 2020. Using influenza surveillance  
680 networks to estimate state-specific prevalence of SARS-CoV-2 in the United States. *Sci.*  
681 *Transl. Med.* 12. <https://doi.org/10.1126/scitranslmed.abc1126>
- 682 55. Xiao, F., Tang, M., Zheng, X., Liu, Y., Li, X., Shan, H., 2020. Evidence for  
683 Gastrointestinal Infection of SARS-CoV-2. *Gastroenterology* 158, 1831-1833.e3.  
684 <https://doi.org/10.1053/j.gastro.2020.02.055>
- 685 56. Peccia, J., Zulli, A., Brackney, D.E., Grubaugh, N.D., Kaplan, E.H., Casanovas-Massana,  
686 A., Ko, A.I., Malik, A.A., Wang, D., Wang, M., Warren, J.L., Weinberger, D.M., Arnold,  
687 W., Omer, S.B., 2020a. Measurement of SARS-CoV-2 RNA in wastewater tracks  
688 community infection dynamics. *Nat. Biotechnol.* 38, 1164–1167.  
689 <https://doi.org/10.1038/s41587-020-0684-z>

- 690 57. Wu, F., Xiao, A., Zhang, J., Moniz, K., Endo, N., Armas, F., Bonneau, R., Brown, M.A.,  
691 Bushman, M., Chai, P.R., Duvallet, C., Erickson, T.B., Foppe, K., Ghaeli, N., Gu, X.,  
692 Hanage, W.P., Huang, K.H., Lee, W.L., Matus, M., McElroy, K.A., Nagler, J., Rhode,  
693 S.F., Santillana, M., Tucker, J.A., Wuertz, S., Zhao, S., Thompson, J., Alm, E.J., 2020a.  
694 SARS-CoV-2 titers in wastewater foreshadow dynamics and clinical presentation of new  
695 COVID-19 cases. medRxiv. <https://doi.org/10.1101/2020.06.15.20117747>
- 696 58. Peccia, J., Zulli, A., Brackney, D.E., Grubaugh, N.D., Kaplan, E.H., Casanovas-Massana,  
697 A., Ko, A.I., Malik, A.A., Wang, D., Wang, M., Warren, J.L., Weinberger, D.M., Omer,  
698 S.B., 2020b. SARS-CoV-2 RNA concentrations in primary municipal sewage sludge as a  
699 leading indicator of COVID-19 outbreak dynamics. medRxiv 2020.05.19.20105999.  
700 <https://doi.org/10.1101/2020.05.19.20105999>
- 701 59. D'Aoust, P.M., Mercier, E., Montpetit, D., Jia, J.-J., Alexandrov, I., Neault, N., Baig,  
702 A.T., Mayne, J., Zhang, X., Alain, T., Langlois, M.-A., Servos, M.R., MacKenzie, M.,  
703 Figeys, D., MacKenzie, A.E., Graber, T.E., Delatolla, R., 2021. Quantitative analysis of  
704 SARS-CoV-2 RNA from wastewater solids in communities with low COVID-19  
705 incidence and prevalence. *Water Res.* 188, 116560.  
706 <https://doi.org/10.1016/j.watres.2020.116560>
- 707 60. Neault, N., Baig, A.T., Graber, T.E., D'Aoust, P.M., Mercier, E., Alexandrov, I., Crosby,  
708 D., Baird, S., Mayne, J., Pounds, T., MacKenzie, M., Figeys, D., MacKenzie, A.,  
709 Delatolla, R., 2020. SARS-CoV-2 Protein in Wastewater Mirrors COVID-19 Prevalence.  
710 medRxiv 2020.09.01.20185280. <https://doi.org/10.1101/2020.09.01.20185280>

- 711 61. Korber, B., Fischer, W.M., Gnanakaran, S., Yoon, H., Theiler, J., Abfalterer, W.,  
712 Hengartner, N., Giorgi, E.E., Bhattacharya, T., Foley, B., Hastie, K.M., Parker, M.D.,  
713 Partridge, D.G., Evans, C.M., Freeman, T.M., de Silva, T.I., Angyal, A., Brown, R.L.,  
714 Carrilero, L., Green, L.R., Groves, D.C., Johnson, K.J., Keeley, A.J., Lindsey, B.B.,  
715 Parsons, P.J., Raza, M., Rowland-Jones, S., Smith, N., Tucker, R.M., Wang, D., Wyles,  
716 M.D., McDanal, C., Perez, L.G., Tang, H., Moon-Walker, A., Whelan, S.P., LaBranche,  
717 C.C., Saphire, E.O., Montefiori, D.C., 2020. Tracking Changes in SARS-CoV-2 Spike:  
718 Evidence that D614G Increases Infectivity of the COVID-19 Virus. *Cell* 182, 812-  
719 827.e19. <https://doi.org/10.1016/j.cell.2020.06.043>
- 720 62. Tu, H., Avenarius, M.R., Kubatko, L., Hunt, M., Pan, X., Ru, P., Garee, J., Thomas, K.,  
721 Mohler, P., Pancholi, P., Jones, D., 2021. Distinct Patterns of Emergence of SARS-CoV-  
722 2 Spike Variants including N501Y in Clinical Samples in Columbus Ohio. *bioRxiv*  
723 2021.01.12.426407. <https://doi.org/10.1101/2021.01.12.426407>
- 724 63. CDC, 2020b. Cases, Data, and Surveillance [Online]. *Cent. Dis. Control Prev.* URL  
725 [https://www.cdc.gov/coronavirus/2019-ncov/cases-updates/variant-surveillance/variant-](https://www.cdc.gov/coronavirus/2019-ncov/cases-updates/variant-surveillance/variant-info.html)  
726 [info.html](https://www.cdc.gov/coronavirus/2019-ncov/cases-updates/variant-surveillance/variant-info.html) (accessed 3.29.21).
- 727 64. Deng, X., Garcia-Knight, M.A., Khalid, M.M., Servellita, V., Wang, C., Morris, M.K.,  
728 Sotomayor-González, A., Glasner, D.R., Reyes, K.R., Gliwa, A.S., Reddy, N.P., Martin,  
729 C.S.S., Federman, S., Cheng, J., Balcerek, J., Taylor, J., Streithorst, J.A., Miller, S.,  
730 Kumar, G.R., Sreekumar, B., Chen, P.-Y., Schulze-Gahmen, U., Taha, T.Y., Hayashi, J.,  
731 Simoneau, C.R., McMahon, S., Lidsky, P.V., Xiao, Y., Hemarajata, P., Green, N.M.,  
732 Espinosa, A., Kath, C., Haw, M., Bell, J., Hacker, J.K., Hanson, C., Wadford, D.A.,  
733 Anaya, C., Ferguson, D., Lareau, L.F., Frankino, P.A., Shivram, H., Wyman, S.K., Ott,

734 M., Andino, R., Chiu, C.Y., 2021. Transmission, infectivity, and antibody neutralization  
735 of an emerging SARS-CoV-2 variant in California carrying a L452R spike protein  
736 mutation. medRxiv 2021.03.07.21252647. <https://doi.org/10.1101/2021.03.07.21252647>

737 65. Xie, X., Liu, Y., Liu, J., Zhang, X., Zou, J., Fontes-Garfias, C.R., Xia, H., Swanson,  
738 K.A., Cutler, M., Cooper, D., Menachery, V.D., Weaver, S.C., Dormitzer, P.R., Shi, P.-  
739 Y., 2021. Neutralization of SARS-CoV-2 spike 69/70 deletion, E484K and N501Y  
740 variants by BNT162b2 vaccine-elicited sera. Nat. Med. 1–2.  
741 <https://doi.org/10.1038/s41591-021-01270-4>

742

743

744

745
